# Supplementary material
Source: PubMed Central journal article supplement (PMC3707674)
Supplement: supp_M112.446542_jbc.M112.446542-1.pdf [file supp_M112.446542_jbc.M112.446542-1.pdf]

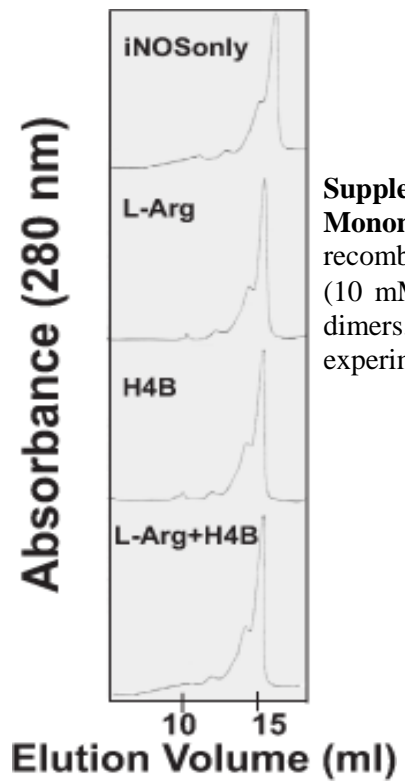

**Supplemental Figure 1 - Dimer recovery from PID-treated iNOS Monomers.** Gel filtration profiles of PID-treated fully monomerized recombinantly expressed iNOSfl proteins after treatment with/without Arg (10 mM) and H<sub>4</sub>B (100 μM) overnight to examine probable recovery of dimers. The shown profiles are representative of three independent experiments done under similar conditions.
