# Supplementary material
Source: PubMed Central journal article supplement (PMC3707674)
Supplement: supp_M112.446542_jbc.M112.446542-2.pdf [file supp_M112.446542_jbc.M112.446542-2.pdf]

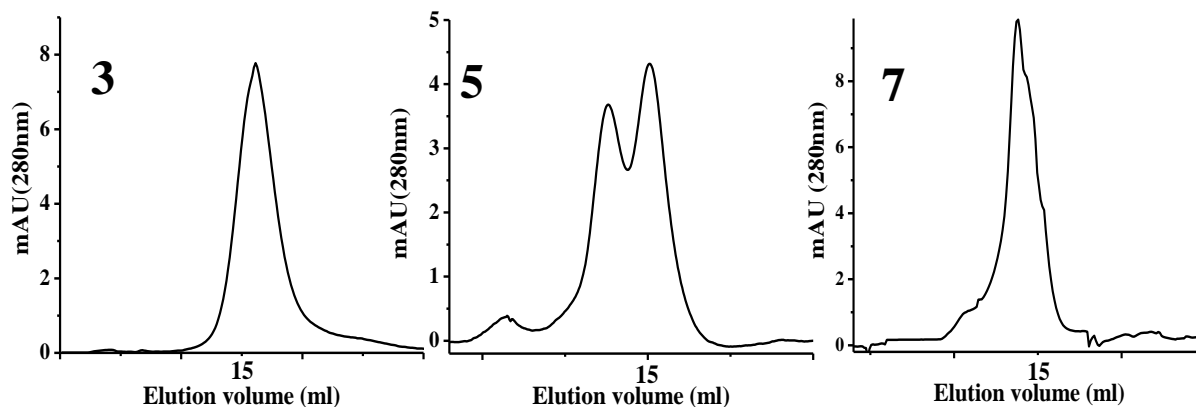

**Supplemental Figure 2 - Gel filtration profiles of selective iNOSfl proteins purified from PID-treated RAW cells as depicted in Figure 6. Sample 3** showing complete monomer for the iNOSfl protein purified from L-NAME untreated RAW cells that were treated with PID from the beginning of iNOSfl synthesis. **Sample 5** shows around 40:60 dimer:monomer in the L-NAME untreated RAW cells that were induced to synthesize iNOSfl for 10 h. **Sample 7** showing almost complete monomerization of the iNOSfl dimers generated in the L-NAME untreated RAW cells induced to synthesize iNOSfl for 10 h and subsequently treated with PID (10  $\mu$ M) for 6 h. The sample numbers correspond to the same proteins as is shown in Figure 6. Details of the experiment are given under 'Experimental Procedures' and the legend of Figure 6. The shown profiles are representative of three independent experiments done under similar conditions.
