# Supplementary material
Source: PubMed Central journal article supplement (PMC3707674)
Supplement: supp_M112.446542_jbc.M112.446542-3.pdf [file supp_M112.446542_jbc.M112.446542-3.pdf]

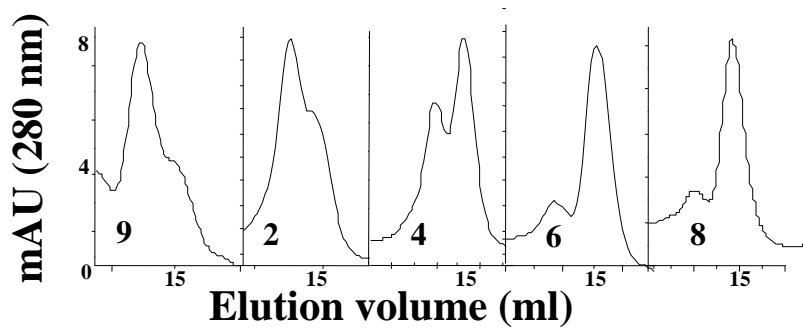

**Supplemental Figure 3 - Gel filtration profiles of PID-treated iNOSfl proteins purified from induced RAW cells showing dimer-monomer content as depicted in Figure 7.** The gel filtration profiles show the pattern of time-dependent monomerization of dimeric iNOSfl proteins purified from PID-treated RAW cells. The sample numbers correspond to the same proteins as is shown in Figure 7. Details of the experiment are given under 'Experimental Procedures' and the legend of Figure 7. The shown profiles are representative of three independent experiments done under similar conditions.
